# Supplementary material for: The prediction of methylation states in human DNA sequences based on hexanucleotide composition and feature selection
Source: Royal Society of Chemistry journal article supplement (doi:10.1039/c3ay41962b), 2013-12-18
Supplement: c3ay41962b.pdf [file c3ay41962b.pdf]

Table S1. The ID numbers of dataset in MethDB

| No      | ID          | No      | ID          |
|---------|-------------|---------|-------------|
| 1       | 725         | 328     | 21098       |
| 2-7     | 735-740     | 329     | 21105       |
| 8-11    | 772-775     | 330     | 21116       |
| 12-14   | 777-779     | 331     | 21123       |
| 15-16   | 802-803     | 332     | 21126       |
| 17-48   | 818-849     | 333-335 | 21127-21129 |
| 49-233  | 855-1039    | 336-360 | 21131-21155 |
| 234     | 1066        | 361     | 21166       |
| 235     | 1107        | 362-363 | 21180-21181 |
| 236-243 | 1114-1121   | 364     | 21206       |
| 244     | 1128        | 365     | 21208       |
| 245-250 | 1130-1135   | 366     | 21226       |
| 251-258 | 1256-1263   | 367     | 21241       |
| 259-263 | 1301-1305   | 368     | 21251       |
| 264-292 | 1373-1401   | 369     | 21259       |
| 293-306 | 1459-1472   | 370     | 21266       |
| 307-308 | 3162-3163   | 371     | 21283       |
| 309-315 | 21046-21052 | 372     | 21285       |
| 316-326 | 21080-21090 | 373-400 | 21350-21377 |
| 327     | 21095       |         |             |
