# Supplementary material for: The prediction of methylation states in human DNA sequences based on hexanucleotide composition and feature selection
Source: Royal Society of Chemistry journal article supplement (doi:10.1039/c3ay41962b), 2013-12-18
Supplement: c3ay41962b_2.pdf [file c3ay41962b_2.pdf]

Table S2. The features which had been singled out by mRMR and GA

| No | Sequence | No | Sequence | No  | Sequence | No  | Sequence |
|----|----------|----|----------|-----|----------|-----|----------|
| 1  | cggcgc   | 42 | gtcaac   | 83  | cgtgac   | 124 | ccaggt   |
| 2  | aagcct   | 43 | gagaaa   | 84  | gcatgc   | 125 | aacggt   |
| 3  | ccgacg   | 44 | tgtctg   | 85  | atgcag   | 126 | ttaaca   |
| 4  | caggcc   | 45 | gccacc   | 86  | tgcgct   | 127 | acgttt   |
| 5  | agtgag   | 46 | agccag   | 87  | tggcga   | 128 | taccgc   |
| 6  | cacgcg   | 47 | agccgt   | 88  | cctggt   | 129 | taggcc   |
| 7  | agtgcg   | 48 | gcaaac   | 89  | agcctg   | 130 | atgtgc   |
| 8  | cagcgc   | 49 | gggttc   | 90  | caccct   | 131 | gctaac   |
| 9  | ccacga   | 50 | ggcttg   | 91  | agaact   | 132 | tgtaca   |
| 10 | ccccac   | 51 | ttggtc   | 92  | ccagct   | 133 | tacatt   |
| 11 | cgtctg   | 52 | cgccct   | 93  | tcagcg   | 134 | agtgcc   |
| 12 | cggccc   | 53 | ggccac   | 94  | cccgtt   | 135 | tagtta   |
| 13 | cggtga   | 54 | cggggt   | 95  | cgcttc   | 136 | gcgtgt   |
| 14 | cgtccg   | 55 | tcgctc   | 96  | gtgcgc   | 137 | tggccc   |
| 15 | atggca   | 56 | tgcccg   | 97  | atggcc   | 138 | accat    |
| 16 | tggtc    | 57 | aaattt   | 98  | ggattt   | 139 | tgtgcg   |
| 17 | tgcgcg   | 58 | gatgag   | 99  | ccgcat   | 140 | gaaaga   |
| 18 | ggaagt   | 59 | agcaag   | 100 | tcgcag   | 141 | cggcga   |
| 19 | cggaaa   | 60 | tcccc    | 101 | gtcagg   | 142 | gagccg   |
| 20 | agagat   | 61 | gccgtc   | 102 | gacgcg   | 143 | cgatgg   |
| 21 | attcca   | 62 | ttgaca   | 103 | atccag   | 144 | ctctgg   |
| 22 | gaaggg   | 63 | caagtc   | 104 | ctcgct   | 145 | cccggg   |
| 23 | cgtgct   | 64 | acctga   | 105 | ctgaag   | 146 | attttc   |
| 24 | cccata   | 65 | gctcct   | 106 | ggcgcg   | 147 | ggtttc   |
| 25 | ccggag   | 66 | taccat   | 107 | actcca   | 148 | gcaggg   |
| 26 | ttgcgc   | 67 | cagtaa   | 108 | ccggcg   | 149 | ccgtcc   |
| 27 | tgggcg   | 68 | tgtca    | 109 | cttctt   | 150 | tggact   |

|    |        |    |        |     |        |     |        |
|----|--------|----|--------|-----|--------|-----|--------|
| 28 | agcctt | 69 | atcaag | 110 | acggcg | 151 | ctgagt |
| 29 | tctcgc | 70 | ccatgc | 111 | caggta | 152 | gcctga |
| 30 | cccgcg | 71 | aagtgg | 112 | tcgtag | 153 | gcagtt |
| 31 | agctcc | 72 | cctgca | 113 | tcacgg | 154 | atgacg |
| 32 | tgcctt | 73 | gacagc | 114 | ctcgcc | 155 | cgttca |
| 33 | gggcgt | 74 | tacggg | 115 | cacaat | 156 | cctcca |
| 34 | cagctc | 75 | gtttta | 116 | gggcaa | 157 | cgtagt |
| 35 | acgcgt | 76 | cccgag | 117 | cagatg | 158 | ctgttc |
| 36 | gcgcgc | 77 | aggcat | 118 | cccatt | 159 | ctggac |
| 37 | tgtgac | 78 | ggaatc | 119 | cacgta | 160 | tgtggg |
| 38 | aggctt | 79 | aagatg | 120 | cgcagt | 161 | ccccgt |
| 39 | gagcga | 80 | gggccc | 121 | cgatcc | 162 | ccagcg |
| 40 | ccgccg | 81 | actgcg | 122 | cgatcc | 163 | ggcggc |
| 41 | gctcca | 82 | cctcac | 123 | ggacac | 164 | tctgag |

---
